# Supplementary material for: Proactive outreach tobacco treatment for socioeconomically disadvantaged smokers with serious mental illness
Source: Springer Nature journal article supplement (doi:10.1007/s10865-019-00083-8), 2019-07-30
Supplement: MOESM1 [file 17025044]

**Supplementary Table 1.** Baseline Characteristics of SMI vs Non-SMI Smokers by Intervention Condition

|  | **SMI** | | **Non-SMI** | |
| --- | --- | --- | --- | --- |
| **Characteristic** | **UC**  **N=451** | **Outreach**  **N=488** | **UC**  **N=667** | **Outreach**  **N=715** |
|  | No. (%) or Mean±SD | | | |
| **Demographics** |  |  |  |  |
| Insurance Program |  |  |  |  |
| Medicaid | 385 (85.4) | 394 (80.7) | 460 (64.3) | 435 (65.2) |
| MnCare | 66 (14.6) | 94 (19.3) | 255 (35.7) | 232 (34.8) |
| Age |  |  |  |  |
| 18-24 | 71 (15.7) | 73 (15.0) | 157 (22.0) | 151 (22.6) |
| 25-34 | 140 (31.0) | 166 (34.0) | 264 (36.9) | 232 (34.8) |
| 35-64 | 240 (53.2) | 249 (51.0) | 294 (41.1) | 284 (42.6) |
| Male | 123 (27.3) | 127 (26.0) | 223 (31.2) | 213 (31.9) |
| Race/Ethnicity |  |  |  |  |
| White | 343 (76.1) | 377 (77.3) | 566 (79.2) | 527 (79.0) |
| Black or African  American | 52 (11.5) | 64 (13.1) | 69 (9.7) | 67 (10.0) |
| Amer Indian or Alaska Native | 40 (8.9) | 31 (6.4) | 45 (6.3) | 47 (7.1) |
| Hispanic or Latino | 7 (1.6) | 7 (1.4) | 12 (1.7) | 16 (2.4) |
| Asian or Pacific Islander | 9 (2.0) | 9 (1.8) | 23 (3.2) | 10 (1.5) |
| Education |  |  |  |  |
| Grade 11/lower | 62 (14.1) | 83 (17.4) | 93 (13.3) | 80 (12.3) |
| HS grad/GED | 143 (32.6) | 162 (34.0) | 232 (33.1) | 225 (34.5) |
| Some college | 187 (42.6) | 202 (42.4) | 281 (40.1) | 271 (41.6) |
| College grad/higher | 47 (10.7) | 30 (6.3) | 95 (13.6) | 76 (11.7) |
| Employment |  |  |  |  |
| Employed/self-employed | 135 (30.5) | 168 (35.2) | 440 (62.4) | 398 (61.0) |
| Student | 39 (8.8) | 35 (7.4) | 34 (4.8) | 50 (7.7) |
| Out of work | 67 (15.1) | 77 (16.2) | 86 (12.2) | 69 (10.6) |
| Unable to work/disabled | 178 (40.2) | 174 (36.6) | 95 (13.5) | 100 (15.3) |
| Homemaker | 24 (5.4) | 22 (4.6) | 50 (7.1) | 35 (5.4) |
| Yearly income |  |  |  |  |
| Less than $10k | 221 (50.5) | 232 (50.0) | 198 (29.1) | 187 (29.5) |
| $10,001-$20k | 130 (29.7) | 135 (29.1) | 206 (30.3) | 227 (35.8) |
| $20,001-$40k | 67 (15.3) | 70 (15.1) | 182 (26.8) | 150 (23.7) |
| More than $40k | 20 (4.6) | 27 (5.8) | 94 (13.8) | 70 (11.0) |

**Supplementary Table 1.** Baseline Characteristics of SMI vs Non-SMI Smokers by Intervention Condition (continued)

|  | **SMI** | | **Non-SMI** | |
| --- | --- | --- | --- | --- |
| **Characteristic** | **UC**  **N=451** | **Outreach**  **N=488** | **UC**  **N=667** | **Outreach**  **N=715** |
|  | No. (%) or Mean±SD | | | |
| **Smoking History** |  |  |  |  |
| Cigs/day | 15.5±9.9 | 14.3±9.4 | 13.0±8.5 | 12.9±9.0 |
| TTFC (minutes) |  |  |  |  |
| ≤ 5 | 156 (34.6) | 143 (29.3) | 161 (22.5) | 146 (21.9) |
| 6 – 30 | 214 (47.5) | 234 (48.0) | 311 (43.5) | 290 (43.5) |
| > 30 | 81 (18.0) | 111 (22.8) | 243 (34.0) | 231 (34.6) |
| Past year quit attempt | 227 (51.0) | 282 (58.8) | 389 (55.1) | 344 (52.6) |
| Age of initiation | 16.1±4.4 | 16.2±4.4 | 16.4±4.6 | 16.2±3.9 |
| **Social Environment** |  |  |  |  |
| Friends/family who smoke |  |  |  |  |
| Over half | 218 (48.9) | 224 (46.2) | 286 (40.3) | 248 (37.5) |
| About half | 83 (18.6) | 118 (24.3) | 207 (29.1) | 190 (28.7) |
| Less than half | 145 (32.5) | 143 (29.5) | 218 (30.7) | 223 (33.7) |
| Home smoking rules |  |  |  |  |
| Smoking is not allowed | 186 (41.6) | 224 (46.1) | 385 (54.2) | 257 (53.9) |
| Smoking is allowed at times | 128 (28.6) | 124 (25.5) | 179 (25.2) | 178 (26.9) |
| Smoking is allowed | 133 (29.8) | 138 (28.4) | 146 (20.6) | 127 (19.2) |
| **Healthcare Provider** |  |  |  |  |
| Regular doctor | 371 (83.9) | 400 (83.3) | 523 (74.0) | 462 (70.9) |
| Doctor advised to quit | 335 (76.5) | 336 (71.8) | 449 (64.1) | 439 (67.9) |
| **Cessation Beliefs** |  |  |  |  |
| Quitting self-efficacy | 4.5±3.0 | 4.8±3.0 | 5.2±3.1 | 5.3±3.1 |
| Contemplation Ladder | 6.1±2.9 | 6.3±3.0 | 6.4±2.8 | 6.3±3.0 |
